# Supplementary material for: Glycosylation Alterations in Multiple Sclerosis Show Increased Proinflammatory Potential
Source: PubMed Central journal article supplement (PMC7599553; doi:10.3390/biomedicines8100410), 2020-10-13
Supplement: biomedicines-08-00410-s001.pdf [file biomedicines-08-00410-s001.pdf]

# Supplementary Materials

## Glycosylation alterations in multiple sclerosis show increased proinflammatory potential

**Ana Cvetko<sup>1</sup>, Domagoj Kifer<sup>1</sup>, Olga Gornik<sup>1,4</sup>, Lucija Klarić<sup>2</sup>, Elizabeth Visser<sup>3</sup>, Gordan Lauc<sup>1,4,\*</sup>, James F. Wilson<sup>2,5</sup> and Tamara Štambuk<sup>1,4,\*</sup>**

<sup>1</sup> Faculty of Pharmacy and Biochemistry, University of Zagreb, 10000 Zagreb, Croatia; [acvetko@pharma.hr](mailto:acvetko@pharma.hr) (A.C.), [dkifer@pharma.hr](mailto:dkifer@pharma.hr) (D.K.), [ogornik@pharma.hr](mailto:ogornik@pharma.hr) (O.G.)

<sup>2</sup> MRC Human Genetics Unit, Institute of Genetics and Molecular Medicine, University of Edinburgh, Edinburgh EH4 2XU, United Kingdom; [klaric.lucija.klaric@gmail.com](mailto:klaric.lucija.klaric@gmail.com) (L.K.), [Jim.Wilson@ed.ac.uk](mailto:Jim.Wilson@ed.ac.uk) (J.F.W.)

<sup>3</sup> The Institute of Applied Health Sciences, MRC University of Aberdeen, Aberdeen AB25 2ZD, United Kingdom; [e.visser@abdn.ac.uk](mailto:e.visser@abdn.ac.uk) (E.V)

<sup>4</sup> Genos Glycoscience Research Laboratory, 10000 Zagreb, Croatia

<sup>5</sup> Centre for Global Health Research, Usher Institute, University of Edinburgh, Edinburgh EH8 9AG, United Kingdom

\* Correspondence: [tstambuk@genos.hr](mailto:tstambuk@genos.hr) (T.Š.); [glauc@pharma.hr](mailto:glauc@pharma.hr) (G.L.); Tel.: +385 1 6394 467 (G.L.)

**Table S1** Compositions and structural features of N-glycans corresponding to every individual plasma (GP) and IgG (IgGP) glycan peak.

| <i>Plasma glycan peak</i> | <i>Observed m/z [M+H]<sup>+</sup></i>               | <i>Observed m/z [M+2H]<sup>2+</sup></i> | <i>Glycan composition*</i>            | <i>Glycan structure<sup>#</sup></i>    | <i>Description</i>                                                                                                               | <i>Formula</i>  |
|---------------------------|-----------------------------------------------------|-----------------------------------------|---------------------------------------|----------------------------------------|----------------------------------------------------------------------------------------------------------------------------------|-----------------|
| GP1                       | 1563.5862                                           | -                                       | H3N4F1                                | FA2                                    | core fucosylated, biantennary                                                                                                    | GP1 / GP * 100  |
| GP2                       | 1786.6643;<br>1355.4825                             | -<br>-                                  | H3N5F1;<br>H5N2                       | FA2B;<br>M5                            | core fucosylated, biantennary with bisecting GlcNAc;<br>high mannose                                                             | GP2 / GP * 100  |
| GP3                       | 1802.6593                                           | -                                       | H4N5                                  | A2BG1                                  | monogalactosylated, biantennary with bisecting GlcNAc                                                                            | GP3 / GP * 100  |
| GP4                       | 1745.6365                                           | -                                       | H4N4F1                                | FA2[6]G1                               | core fucosylated and monogalactosylated,<br>biantennary                                                                          | GP4 / GP * 100  |
| GP5                       | 1745.6366                                           | -                                       | H4N4F1                                | FA2[3]G1                               | core fucosylated and monogalactosylated,<br>biantennary                                                                          | GP5 / GP * 100  |
| GP6                       | 1948.7116                                           | 974.8585                                | H4N5F1                                | FA2[6]BG1                              | core fucosylated and monogalactosylated,<br>biantennary with bisecting GlcNAc                                                    | GP6 / GP * 100  |
| GP7                       | 1517.5309;<br>1948.7125                             | -<br>-                                  | H6N2;<br>H4N5F1                       | M6;<br>FA2[3]BG1                       | high mannose;<br>core fucosylated and monogalactosylated,<br>biantennary with bisecting GlcNAc                                   | GP7 / GP * 100  |
| GP8                       | 1761.6325                                           | -                                       | H5N4                                  | A2G2                                   | digalactosylated, biantennary                                                                                                    | GP8 / GP * 100  |
| GP9                       | 1964.7084                                           | -                                       | H5N5                                  | A2BG2                                  | digalactosylated, biantennary with bisecting GlcNAc                                                                              | GP9 / GP * 100  |
| GP10                      | 1907.6891                                           | -                                       | H5N4F1                                | FA2G2                                  | core fucosylated, digalactosylated, biantennary                                                                                  | GP10 / GP * 100 |
| GP11                      | 2110.7604                                           | 1055.8841                               | H5N5F                                 | FA2BG2                                 | core fucosylated, digalactosylated, biantennary with<br>bisecting GlcNAc                                                         | GP11 / GP * 100 |
| GP12                      | 1679.5653;<br>2052.7202;<br>1849.6453;<br>2093.7602 | 840.2521;<br><br>925.8160;              | H7N2;<br>H5N4S1;<br>H5N3S1;<br>H4N5S1 | M7;<br>A2G2S1;<br>A1M4G1S1;<br>A2BG1S1 | high mannose;<br>digalactosylated, monosialylated, biantennary;<br>hybrid, monogalactosylated, monosialylated,<br>monoantennary; | GP12 / GP * 100 |

|      |                                                                   |                                                                   |                                                        |                                                        |                                                                                                                                                                                                                                                                                                                              |                 |
|------|-------------------------------------------------------------------|-------------------------------------------------------------------|--------------------------------------------------------|--------------------------------------------------------|------------------------------------------------------------------------------------------------------------------------------------------------------------------------------------------------------------------------------------------------------------------------------------------------------------------------------|-----------------|
|      |                                                                   |                                                                   |                                                        |                                                        | monogalactosylated, monosialylated, biantennary with bisecting GlcNAc                                                                                                                                                                                                                                                        |                 |
| GP13 | 2036.7265;<br>2239.8003                                           | -<br>-                                                            | H4N4F1S1;<br>H4N5F1S1                                  | FA2G1S1;<br>FA2BG1S1                                   | core fucosylated, monogalactosylated and monosialylated biantennary;<br>core fucosylated, monogalactosylated and monosialylated biantennary with bisecting GlcNAc                                                                                                                                                            | GP13 / GP * 100 |
| GP14 | 2052.7207                                                         | -                                                                 | H5N4S1                                                 | A2G2S1                                                 | digalactosylated and monosialylated biantennary                                                                                                                                                                                                                                                                              | GP14 / GP * 100 |
| GP15 | 2255.7954                                                         | -                                                                 | H5N5S1                                                 | A2BG2S1                                                | digalactosylated and monosialylated biantennary with bisecting GlcNAc                                                                                                                                                                                                                                                        | GP15 / GP * 100 |
| GP16 | 2198.7771                                                         | 1099.8897                                                         | H5N4F1S1                                               | FA2G2S1                                                | core fucosylated, digalactosylated and monosialylated biantennary                                                                                                                                                                                                                                                            | GP16 / GP * 100 |
| GP17 | 2401.8537                                                         | 1201.4297                                                         | H5N5F1S1                                               | FA2BG2S1                                               | core fucosylated, digalactosylated and monosialylated biantennary with bisecting GlcNAc                                                                                                                                                                                                                                      | GP17/ GP * 100  |
| GP18 | 2343.8090;<br>2489.8631                                           | 1172.4072;<br>1245.4346                                           | H5N4S2;<br>H5N4F1S2                                    | A2G2S2;<br>FA2G2S2                                     | digalactosylated and disialylated biantennary;<br>core fucosylated, digalactosylated and disialylated biantennary                                                                                                                                                                                                            | GP18 / GP * 100 |
| GP19 | 2003.6778                                                         | -                                                                 | H9N2                                                   | M9                                                     | high mannose                                                                                                                                                                                                                                                                                                                 | GP19 / GP * 100 |
| GP20 | 2343.8084                                                         | 1172.4068                                                         | H5N4S2                                                 | A2G2S2                                                 | digalactosylated and disialylated biantennary                                                                                                                                                                                                                                                                                | GP20 / GP * 100 |
| GP21 | 2343.7938;<br>2417.8385;<br>2489.8675;<br>2546.8731;<br>2563.9034 | 1172.3986;<br>1209.4216;<br>1245.4324;<br>1273.9417;<br>1282.4526 | H5N4S2;<br>H6N5S1;<br>H5N4F1S2;<br>H5N5S2;<br>H6N5F1S1 | A2G2S2;<br>A3G3S1;<br>FA2G2S2;<br>A2BG2S2;<br>A3F1G3S1 | digalactosylated and disialylated biantennary;<br>trigalactosylated and monosialylated triantennary;<br>core fucosylated, digalactosylated and disialylated biantennary;<br>digalactosylated and disialylated biantennary with bisecting GlcNAc;<br>antennary fucosylated, trigalactosylated and monosialylated triantennary | GP21 / GP * 100 |
| GP22 | 2489.8653                                                         | 1245.4354                                                         | H5N4F1S2                                               | FA2G2S2                                                | core fucosylated, digalactosylated and disialylated biantennary                                                                                                                                                                                                                                                              | GP22 / GP * 100 |

|      |                         |                         |                     |                     |                                                                                                                              |                 |
|------|-------------------------|-------------------------|---------------------|---------------------|------------------------------------------------------------------------------------------------------------------------------|-----------------|
| GP23 | 2692.9402               | 1346.9743               | H5N5F1S2            | FA2BG2S2            | core fucosylated, digalactosylated and disialylated biantennary with bisecting GlcNAc                                        | GP23 / GP * 100 |
| GP24 | 2708.9912;<br>2563.8988 | 1354.9717;<br>1282.4540 | H6N5S2;<br>H6N5F1S1 | A3G3S2;<br>A3F1G3S1 | trigalactosylated and disialylated triantennary;<br>antennary fucosylated, trigalactosylated and monosialylated triantennary | GP24 / GP * 100 |
| GP25 | 2708.9367;<br>2854.9980 | 1354.9713;<br>1427.9960 | H6N5S2;<br>H6N5F1S2 | A3G3S2;<br>A3F1G3S2 | trigalactosylated and disialylated triantennary;<br>antennary fucosylated, trigalactosylated and disialylated triantennary   | GP25 / GP * 100 |
| GP26 | 2708.9379;<br>2854.9924 | 1354.9705;<br>1427.9961 | H6N5S2;<br>H6N5F1S2 | A3G3S2;<br>FA3G3S2  | trigalactosylated and disialylated triantennary;<br>core fucosylated, trigalactosylated and disialylated triantennary        | GP26 / GP * 100 |
| GP27 | 2854.9916               | 1427.9980               | H6N5F1S2            | A3F1G3S2            | antennary fucosylated, trigalactosylated and disialylated triantennary                                                       | GP27 / GP * 100 |
| GP28 | 3000.0218;<br>2854.9941 | 1500.5163;<br>1428.0000 | H6N5S3;<br>H6N5F1S2 | A3G3S3;<br>A3F1G3S2 | trigalactosylated and trisialylated triantennary;<br>antennary fucosylated, trigalactosylated and disialylated triantennary  | GP28 / GP * 100 |
| GP29 | 3000.0268<br>2854.9869  | 1500.5155;<br>1428.0008 | H6N5S3;<br>H6N5F1S2 | A3G3S3;<br>A3F1G3S2 | trigalactosylated and trisialylated triantennary;<br>antennary fucosylated, trigalactosylated and disialylated triantennary  | GP29 / GP * 100 |
| GP30 | 3000.0330               | 1500.5178               | H6N5S3              | A3G3S3              | trigalactosylated and trisialylated triantennary                                                                             | GP30 / GP * 100 |
| GP31 | 3146.0844;<br>3000.0330 | 1573.5457;<br>1500.5189 | H6N5F1S3;<br>H6N5S3 | FA3G3S3;<br>A3G3S3  | core fucosylated, trigalactosylated and trisialylated triantennary;<br>trigalactosylated and trisialylated triantennary      | GP31 / GP * 100 |
| GP32 | 3000.0323               | 1500.5171               | H6N5S3              | A3G3S3              | trigalactosylated and trisialylated triantennary                                                                             | GP32 / GP * 100 |
| GP33 | 3146.0864               | 1573.5464               | H6N5F1S3            | A3F1G3S3            | antennary fucosylated, trigalactosylated and trisialylated triantennary                                                      | GP33 / GP * 100 |
| GP34 | 3146.0879;<br>3365.1553 | 1573.5463;<br>1683.0832 | H6N5F1S3;<br>H7N6S3 | FA3G3S3;<br>A4G4S3  | core fucosylated, trigalactosylated and trisialylated triantennary;<br>tetragalactosylated and trisialylated tetraantennary  | GP34 / GP * 100 |

|                                       |                                                       |                                                         |                                       |                                                |                                                                                                                                                                                 |                       |
|---------------------------------------|-------------------------------------------------------|---------------------------------------------------------|---------------------------------------|------------------------------------------------|---------------------------------------------------------------------------------------------------------------------------------------------------------------------------------|-----------------------|
| GP35                                  | 3292.1600;<br>3511.2335                               | 1646.5752;<br>1756.1192                                 | H6N5F2S3;<br>H7N6F1S3                 | FA3F1G3S3;<br>A4F1G4S3                         | core fucosylated, antennary fucosylated,<br>trigalactosylated and trisialylated triantennary;<br>antennary fucosylated, tetragalactosylated and<br>trisialylated tetraantennary | GP35 / GP * 100       |
| GP36                                  | 3365.1775;<br>3511.2223                               | 1683.0865;<br>1756.1162                                 | H7N6S3;<br>H7N6F1S3                   | A4G4S3;<br>A4F1G4S3                            | tetragalactosylated and trisialylated tetraantennary;<br>antennary fucosylated, tetragalactosylated and<br>trisialylated tetraantennary                                         | GP36 / GP * 100       |
| GP37                                  | 3656.2734;<br>3511.2223                               | 1828.6331;<br>1756.1321                                 | H7N6S4;<br>H7N6F1S3                   | A4G4S4;<br>A4F1G4S3                            | tetragalactosylated and tetrasialylated tetraantennary;<br>antennary fucosylated, tetragalactosylated and<br>trisialylated tetraantennary                                       | GP37 / GP * 100       |
| GP38                                  | 3656.5766;<br>3802.4774                               | 1828.6420;<br>1901.6858                                 | H7N6S4;<br>H7N6F1S4                   | A4G4S4;<br>A4F1G4S4                            | tetragalactosylated and tetrasialylated tetraantennary;<br>antennary fucosylated, tetragalactosylated and<br>tetrasialylated tetraantennary                                     | GP38 / GP * 100       |
| GP39                                  | 3802.4178;<br>3949.3420                               | 1901.6858;<br>1974.6839                                 | H7N6F1S4;<br>H7N6F2S4                 | A4F1G4S4;<br>A4F2G4S4                          | antennary fucosylated, tetragalactosylated and<br>tetrasialylated tetraantennary;<br>antennary difucosylated, tetragalactosylated and<br>tetrasialylated tetraantennary;        | GP39 / GP * 100       |
| <b><i>IgG<br/>glycan<br/>peak</i></b> | <b><i>Observed<br/>m/z,<br/>[M+H]<sup>+</sup></i></b> | <b><i>Observed<br/>m/z,<br/>[M+2H]<sup>2+</sup></i></b> | <b><i>Glycan<br/>composition*</i></b> | <b><i>Glycan<br/>structure<sup>#</sup></i></b> | <b><i>Description</i></b>                                                                                                                                                       | <b><i>Formula</i></b> |
| IgGP1                                 | 1380.5101                                             | -                                                       | H3N3F1                                | FA1                                            | core fucosylated, monoantennary                                                                                                                                                 | IgGP1 / IgGP *<br>100 |
| IgGP2                                 | 1437.5302                                             | -                                                       | H3N4                                  | A2                                             | agalactosylated, biantennary                                                                                                                                                    | IgGP2 / IgGP *<br>100 |
| IgGP3                                 | 1640.6062                                             | -                                                       | H3N5                                  | A2B                                            | biantennary with bisecting GlcNAc                                                                                                                                               | IgGP3 / IgGP *<br>100 |
| IgGP4                                 | 1583.5818                                             | -                                                       | H3N4F1                                | FA2                                            | core fucosylated, biantennary                                                                                                                                                   | IgGP4 / IgGP *<br>100 |

|        |                                       |                     |                                 |                                      |                                                                                                                                                                                                          |                        |
|--------|---------------------------------------|---------------------|---------------------------------|--------------------------------------|----------------------------------------------------------------------------------------------------------------------------------------------------------------------------------------------------------|------------------------|
| IgGP5  | 1355.4761                             | -                   | H5N2                            | M5                                   | high mannose                                                                                                                                                                                             | IgGP5 / IgGP *<br>100  |
| IgGP6  | 1786.6998;<br>1599.5745               | -                   | H3N5F1;<br>H4N4                 | FA2B;<br>A2[6]G1                     | core fucosylated, biantennary with bisecting GlcNAc;<br>monogalactosylated, biantennary                                                                                                                  | IgGP6 / IgGP *<br>100  |
| IgGP7  | 1599.5766                             | -                   | H4N4                            | A2[3]G1                              | monogalactosylated, biantennary                                                                                                                                                                          | IgGP7 / IgGP *<br>100  |
| IgGP8  | 1802.6514<br>1745.6307                | -<br>-              | H4N5<br>H4N4F1                  | A2BG1;<br>FA2[6]G1                   | monogalactosylated, biantennary with bisecting<br>GlcNAc;<br>core fucosylated and monogalactosylated,<br>biantennary                                                                                     | IgGP8 / IgGP *<br>100  |
| IgGP9  | 1745.6276                             | -                   | H4N4F1                          | FA2[3]G1                             | core fucosylated and monogalactosylated,<br>biantennary                                                                                                                                                  | IgGP9 / IgGP *<br>100  |
| IgGP10 | 1948.7034                             | 974.8533            | H4N5F1                          | FA2[6]BG1                            | core fucosylated and monogalactosylated,<br>biantennary with bisecting GlcNAc                                                                                                                            | IgGP10 / IgGP *<br>100 |
| IgGP11 | 1948.7022                             | -                   | H4N5F1                          | FA2[3]BG1                            | core fucosylated and monogalactosylated,<br>biantennary with bisecting GlcNAc                                                                                                                            | IgGP11 / IgGP *<br>100 |
| IgGP12 | 1761.6235                             | -                   | H5N4                            | A2G2                                 | digalactosylated, biantennary                                                                                                                                                                            | IgGP12 / IgGP *<br>100 |
| IgGP13 | 1964.6982                             | -                   | H5N5                            | A2BG2                                | digalactosylated, biantennary with bisecting GlcNAc                                                                                                                                                      | IgGP13 / IgGP *<br>100 |
| IgGP14 | 1907.6764                             | -                   | H5N4F1                          | FA2G2                                | core fucosylated, digalactosylated, biantennary                                                                                                                                                          | IgGP14 / IgGP *<br>100 |
| IgGP15 | 1890.6524;<br>1833.6432;<br>2110.7544 | -<br>-<br>1055.8796 | H4N4S1;<br>H4N3F1S1<br>H5N5F1   | A2G1S1;<br>FA1G1S1;<br>FA2BG2        | monogalactosylated and monosialylated biantennary;<br>core fucosylated, monogalactosylated and<br>monosialylated monoantennary; core fucosylated,<br>digalactosylated, biantennary with bisecting GlcNAc | IgGP15 / IgGP *<br>100 |
| IgGP16 | 2093.7000<br>2036.7205;<br>1849.6587; | -<br>-<br>-         | H4N5S1;<br>H4N4F1S1;<br>H5N3S1; | A2BG1S1;<br>FA2[6]G1S1;<br>A1M4G1S1; | monogalactosylated and monosialylated biantennary<br>with bisecting GlcNAc;                                                                                                                              | IgGP16 / IgGP *<br>100 |

|        |                          |           |                       |                            |                                                                                                                                                                                                                                                                                                      |                        |
|--------|--------------------------|-----------|-----------------------|----------------------------|------------------------------------------------------------------------------------------------------------------------------------------------------------------------------------------------------------------------------------------------------------------------------------------------------|------------------------|
|        | 2239.7949;<br>2036.7205; | -<br>-    | H4N5F1S1;<br>H4N4F1S1 | FA2[6]BG1S1;<br>FA2[3]G1S1 | core fucosylated, monogalactosylated and monosialylated biantennary;<br>hybrid, monogalactosylated and monosialylated biantennary;<br>core fucosylated, monogalactosylated, monosialylated biantennary with bisecting GlcNAc;<br>core fucosylated, monogalactosylated and monosialylated biantennary |                        |
| IgGP17 | 2239.7899;<br>2052.7108  | -<br>-    | H4N5F1S1;<br>H5N4S1   | FA2[3]BG1S1;<br>A2G2S1     | core fucosylated, monogalactosylated, monosialylated biantennary with bisecting GlcNAc;<br>digalactosylated and monosialylated biantennary                                                                                                                                                           | IgGP17/ IgGP *<br>100  |
| IgGP18 | 2255.7695;<br>2198.8215  | -<br>-    | H5N5S1;<br>H5N4F1S1   | A2BG2S1;<br>FA2G2S1        | digalactosylated and monosialylated biantennary with bisecting GlcNAc;<br>core fucosylated, digalactosylated and monosialylated biantennary                                                                                                                                                          | IgGP18 / IgGP *<br>100 |
| IgGP19 | 2401.8390                | 1201.4220 | H5N5F1S1              | FA2BG2S1                   | core fucosylated, digalactosylated and monosialylated biantennary with bisecting GlcNAc                                                                                                                                                                                                              | IgGP19 / IgGP *<br>100 |
| IgGP20 |                          |           |                       | structure not determined   |                                                                                                                                                                                                                                                                                                      | IgGP20 / IgGP *<br>100 |
| IgGP21 | 2343.8028                | 1172.4019 | H5N4S2                | A2G2S2                     | digalactosylated and disialylated biantennary                                                                                                                                                                                                                                                        | IgGP21 / IgGP *<br>100 |
| IgGP22 | 2546.8809                | 1273.9423 | H5N5S2                | A2BG2S2                    | digalactosylated and disialylated biantennary with bisecting GlcNAc                                                                                                                                                                                                                                  | IgGP22 / IgGP *<br>100 |
| IgGP23 | 2489.8596                | 1245.4309 | H5N4F1S2              | FA2G2S2                    | core fucosylated, digalactosylated and disialylated biantennary                                                                                                                                                                                                                                      | IgGP23 / IgGP *<br>100 |
| IgGP24 | 2692.9315                | 1346.9673 | H5N5F1S2              | FA2BG2S2                   | core fucosylated, digalactosylated and disialylated biantennary with bisecting GlcNAc                                                                                                                                                                                                                | IgGP24 / IgGP *<br>100 |

\*composition abbreviations – Hx, number (x) of hexose residues; Nx, number (x) of GlcNAc residues; Fx, number (x) of fucose residues; Sx, number (x) of N-acetylneuraminic acid residues.

\*structure abbreviations – all N-glycans have two core GlcNAcs; F at the start of the abbreviation indicates a core-fucose  $\alpha$ 1,6-linked to the inner GlcNAc; Mx, number (x) of mannose on core GlcNAcs; Ax, number of antenna (GlcNAc) on trimannosyl core; A2, biantennary with both GlcNAcs as  $\beta$ 1,2-linked; A3, triantennary with a GlcNAc linked  $\beta$ 1,2 to both mannose and the third GlcNAc linked  $\beta$ 1,4 to the  $\alpha$ 1,3 linked mannose; A4, GlcNAcs linked as A3 with additional GlcNAc  $\beta$ 1,6 linked to  $\alpha$ 1,6 mannose; B, bisecting GlcNAc linked  $\beta$ 1,4 to  $\beta$ 1,3 mannose; G(x), number (x) of  $\beta$ 1,4 linked galactose on antenna; F(x), number (x) of fucose linked  $\alpha$ 1,3 to antenna GlcNAc; S(x), number (x) of sialic acids linked to galactoses.

**Table S2** IgG derived glycan traits calculated out of 24 directly measured IgG glycan peaks.

| <i>Structural feature</i>         | <i>Formula</i>                                                                               |
|-----------------------------------|----------------------------------------------------------------------------------------------|
| Agalactosylation (G0)             | IgGP1+IgGP2+IgGP4+IgGP6                                                                      |
| Monogalactosylation (G1)          | IgGP7+IgGP8+IgGP9+IgGP10+IgGP11+IgGP16                                                       |
| Digalactosylation (G2)            | IgGP12+IgGP13+IgGP14+IgGP15+IgGP17+IgGP18+IgGP19+IgGP21+IgGP22+IgGP23+IgGP24                 |
| Neutral glycans (S0)              | IgGP7+IgGP8+IgGP9+IgGP10+IgGP11+IgGP12+IgGP13+IgGP14+IgGP15                                  |
| Monosialylation (S1)              | IgGP16+IgGP17+IgGP18+IgGP19                                                                  |
| Disialylation (S2)                | IgGP21+IgGP22+IgGP23+IgGP24                                                                  |
| Incidence of bisecting GlcNAc (B) | IgGP6+IgGP10+IgGP11+IgGP13+IgGP15+IgGP19+IgGP22+IgGP24                                       |
| Core fucosylation (CF)            | IgGP1+IgGP4+IgGP6+IgGP8+IgGP9+IgGP10+IgGP11+IgGP14+IgGP15+IgGP16+IgGP18+IgGP19+IgGP23+IgGP24 |
| High mannose glycans (HM)         | IgGP5                                                                                        |



**Table S3** Plasma derived glycan traits calculated out of 39 directly measured plasma protein glycan peaks.

| <i>Structural feature</i>                             | <i>Formula</i>                                                                                       |
|-------------------------------------------------------|------------------------------------------------------------------------------------------------------|
| Low branching (mono- and biantennary glycans) (LB)    | GP1+GP2+GP3+GP4+GP5+GP6+GP8+GP9+GP10+GP11+0.5xGP12+GP13+GP14+GP15+GP16+GP17+GP18+GP20+GP21+GP22+GP23 |
| High branching (tri- and tetraantennary glycans) (HB) | GP24+GP25+GP26+GP27+GP28+GP29+GP30+GP31+GP32+GP33+GP34+GP35+GP36+GP37+GP38+GP39                      |
| Agalactosylation (G0)                                 | GP1+GP2                                                                                              |
| Monogalactosylation (G1)                              | GP3+GP4+GP5+GP6+GP13                                                                                 |
| Digalactosylation (G2)                                | GP8+GP9+GP10+GP11+0.5xGP12+GP14+GP15+GP16+GP17+GP18+GP20+GP21+GP22+GP23                              |
| Trigalactosylation (G3)                               | GP24+GP25+GP26+GP27+GP28+GP29+GP30+GP31+GP32+GP33+GP34+ GP35                                         |
| Tetragalactosylation (G4)                             | GP36+GP37+GP38+GP39                                                                                  |
| Neutral glycans (S0)                                  | GP1+GP2+GP3+GP4+GP5+GP6+GP8+GP9+GP10+GP11                                                            |
| Monosialylation (S1)                                  | 0.5xGP12+GP13+GP14+GP15+GP16+GP17                                                                    |
| Disialylation (S2)                                    | GP18+GP20+GP21+GP22+GP23+GP24+GP25+GP26+GP27                                                         |
| Trisialylation (S3)                                   | GP28+GP29+GP30+GP31+GP32+GP33+GP34+GP35+GP36                                                         |
| Tetrasialylation (S4)                                 | GP37+GP38+GP39                                                                                       |
| Incidence of bisecting GlcNAc (B)                     | GP2+GP3+GP6+GP9+GP11+GP15+GP17+GP23                                                                  |
| Antennary fucosylation (AF)                           | GP27+GP33+GP35+GP39                                                                                  |
| Core fucosylation (CF)                                | GP1+GP2+GP4+GP5+GP6+GP10+GP11+GP13+GP16+GP17+GP22+GP23+GP31+GP34+GP35                                |
| High mannose structures (HM)                          | GP7+0.5xGP12+GP19                                                                                    |

## Initial IgG glycan traits

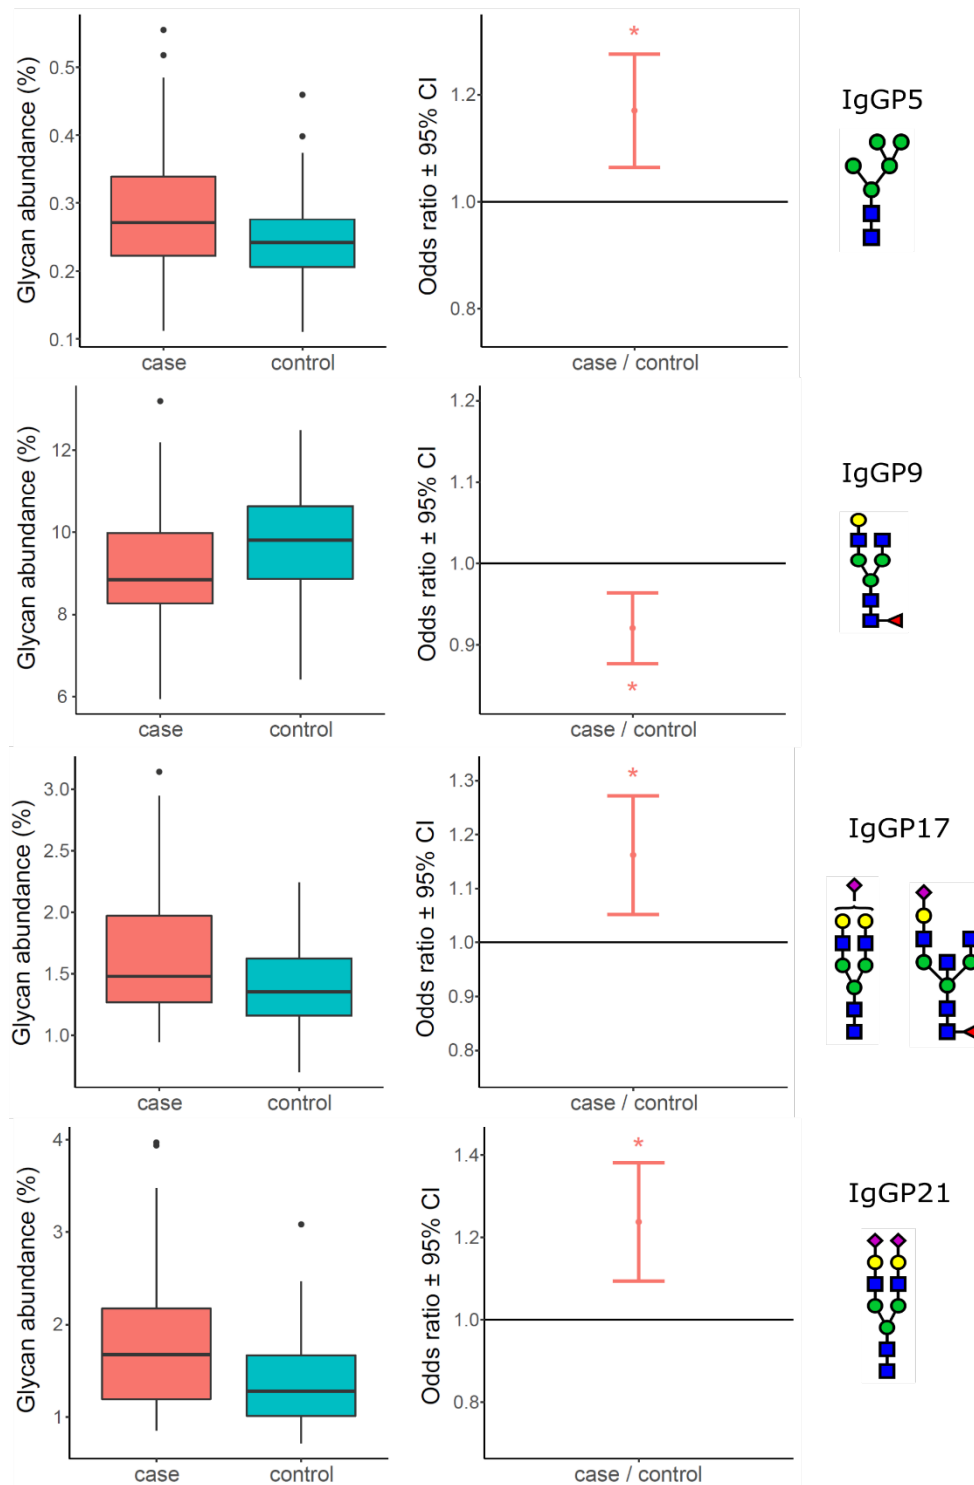

**Figure S1** Most prominent differences between MS subjects and matched controls in directly measured IgG glycans. Left part of the figure shows boxplots representing differences in glycan abundances, while right part shows odds ratio plots, resulting from post-hoc tests. Boxes in the boxplot are ranging from 25<sup>th</sup> to 75<sup>th</sup> percentile, with the median represented as a line inside the box. The whiskers of the boxplot extend from both percentiles, 75<sup>th</sup> percentile for upper whisker and 25<sup>th</sup> for lower whisker, to the values within 1.5xIQR. IQR is the interquartile range, also known as the distance from the first to the third quartile. Data outside the whiskers' ends are outliers and are plotted individually. On the odds ratio plots, middle dot represents odds ratio value for represented IgGP surrounded by its 95% confidence interval (CI). Odds ratio of 1.0 means that there is no

difference between compared groups for the given IgGP. Asterisk symbols represent statistical significance: \* <0.05; \*\*<0.01.

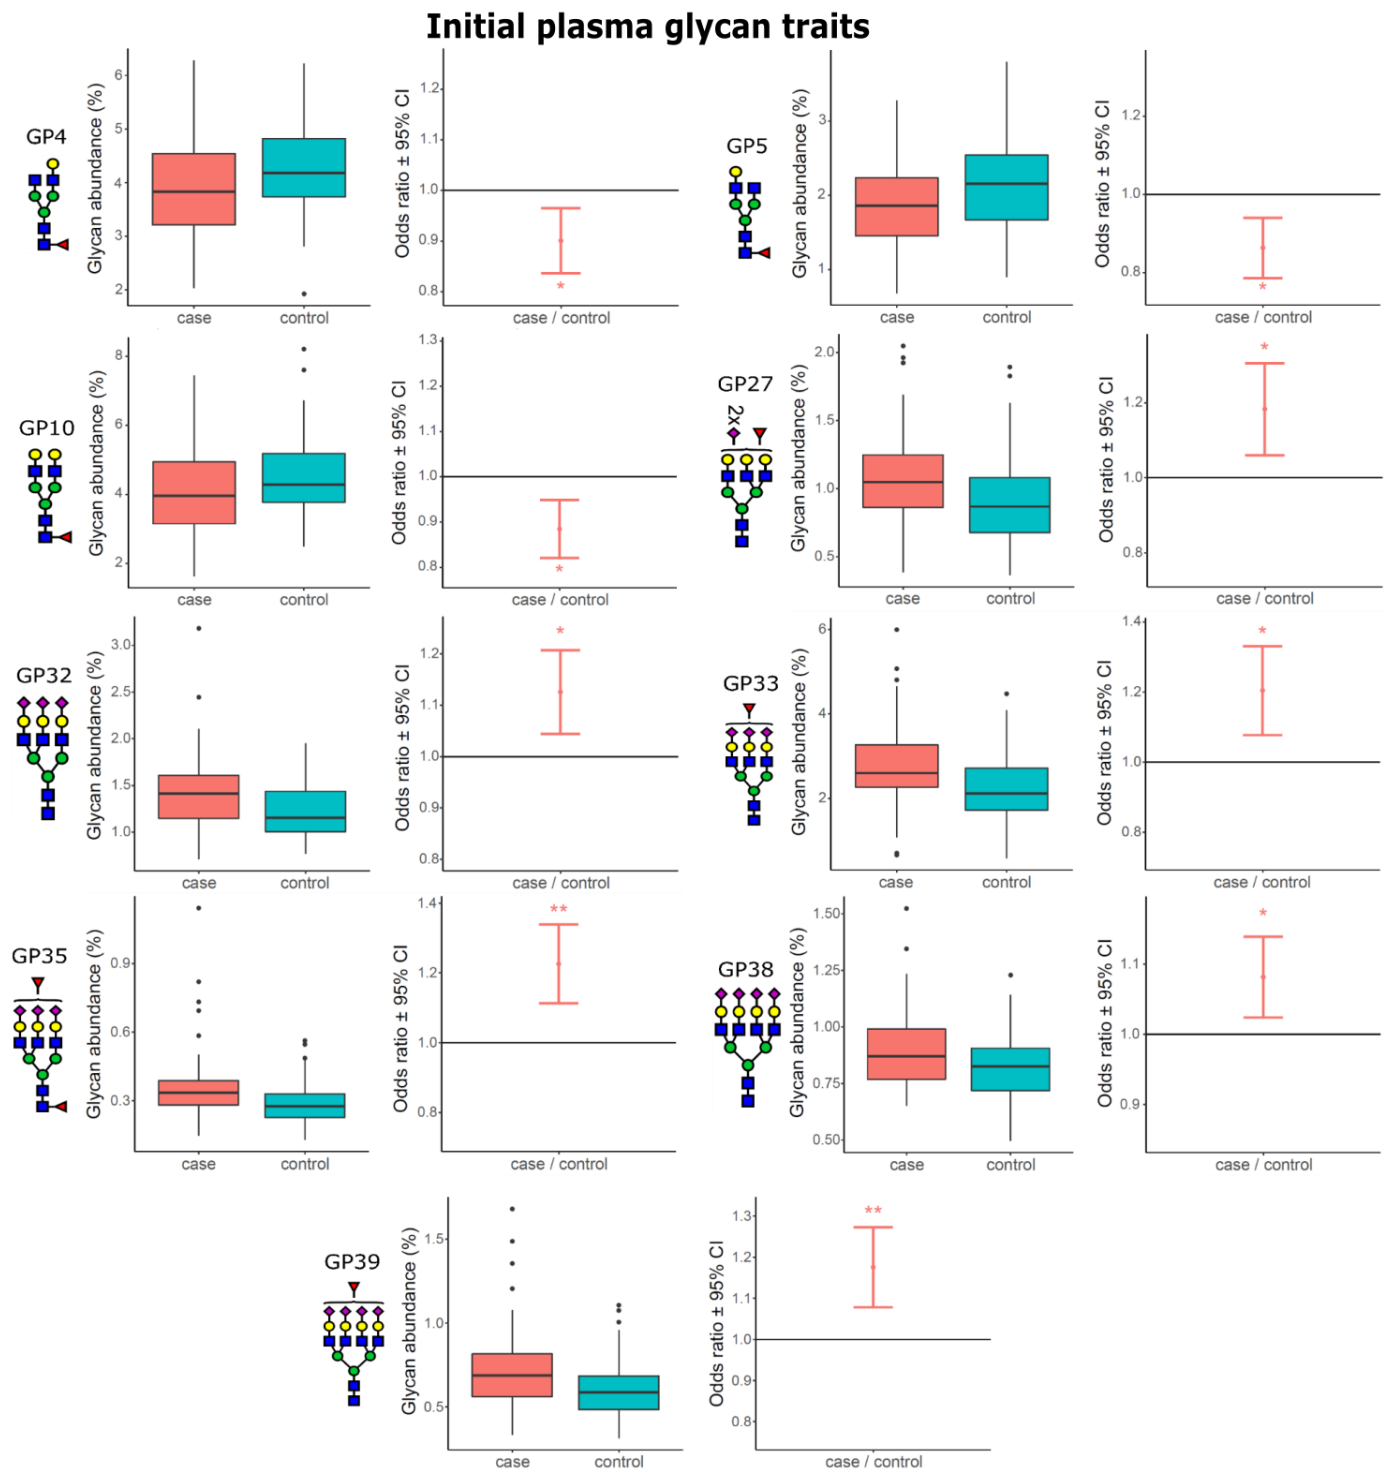

**Figure S2** Most prominent differences between MS subjects and matched controls in directly measured plasma protein glycans. The left part of the figure shows boxplots representing differences in glycan abundances, while the right part shows odds ratio plots, resulting from post-hoc tests. Boxes in the boxplot are ranging from 25<sup>th</sup> to 75<sup>th</sup> percentile, with the median represented as a line inside the box. The whiskers of the boxplot extend from both percentiles, 75<sup>th</sup> percentile for upper whisker and 25<sup>th</sup> for lower whisker, to the values within 1.5×IQR. IQR is the inter-quartile range, also known as the distance from the first to the third quartile. Data outside the whiskers' ends are outliers and are plotted individually. On the odds ratio plots, middle dot represents odds

ratio value for represented GP surrounded by its 95% confidence interval (CI). Odds ratio of 1.0 means that there is no difference between compared groups for the given GP. Asterisk symbols represent statistical significance: \* <0.05; \*\*<0.01.

**Table S4** Comparison of IgG and plasma protein derived glycan traits between subjects with multiple sclerosis and matched controls. Differences are expressed as odds ratio values, resulting from post-hoc tests. Glycan data were adjusted for age and sex, while false discovery rate was controlled using Benjamini-Hochberg method. Significant differences are in bold.

| <i>N-glycan origin</i> | <i>Derived trait</i> | <i>Odds ratio</i> | <i>95% CI</i>      | <i>p-value</i>                 | <i>Adjusted p-value</i>        |
|------------------------|----------------------|-------------------|--------------------|--------------------------------|--------------------------------|
| <b>IgG</b>             | <b>CF</b>            | <b>0.84</b>       | <b>0.77 – 0.91</b> | <b>7.03 x 10<sup>-05</sup></b> | <b>6.96 x 10<sup>-03</sup></b> |
| <b>IgG</b>             | <b>HM</b>            | <b>1.17</b>       | <b>1.06 – 1.28</b> | <b>7.48 x 10<sup>-04</sup></b> | <b>1.48 x 10<sup>-02</sup></b> |
| IgG                    | B                    | 1.07              | 1.02 – 1.12        | 8.04 x 10 <sup>-03</sup>       | 9.95 x 10 <sup>-02</sup>       |
| IgG                    | S0                   | 0.95              | 0.90 – 0.99        | 3.41 x 10 <sup>-02</sup>       | 1.99 x 10 <sup>-01</sup>       |
| IgG                    | S2                   | 1.08              | 1.00 – 1.16        | 3.25 x 10 <sup>-02</sup>       | 1.99 x 10 <sup>-01</sup>       |
| IgG                    | G1                   | 0.97              | 0.94 – 1.00        | 5.00 x 10 <sup>-02</sup>       | 2.18 x 10 <sup>-01</sup>       |
| IgG                    | G0                   | 1.03              | 0.94 – 1.12        | 5.24 x 10 <sup>-01</sup>       | 7.75 x 10 <sup>-01</sup>       |
| IgG                    | S1                   | 1.01              | 0.96 – 1.07        | 6.45 x 10 <sup>-01</sup>       | 8.40 x 10 <sup>-01</sup>       |
| IgG                    | G2                   | 0.99              | 0.91 – 1.07        | 7.86 x 10 <sup>-01</sup>       | 9.05 x 10 <sup>-01</sup>       |
| <i>N-glycan origin</i> | <i>Derived trait</i> | <i>Odds ratio</i> | <i>95% CI</i>      | <i>p-value</i>                 | <i>Adjusted p-value</i>        |
| <b>plasma</b>          | <b>AF</b>            | <b>1.21</b>       | <b>1.09 – 1.32</b> | <b>1.67 x 10<sup>-04</sup></b> | <b>6.78 x 10<sup>-03</sup></b> |
| <b>plasma</b>          | <b>LB</b>            | <b>0.93</b>       | <b>0.89 – 0.97</b> | <b>8.22 x 10<sup>-04</sup></b> | <b>1.66 x 10<sup>-02</sup></b> |
| <b>plasma</b>          | <b>S3</b>            | <b>1.09</b>       | <b>1.04 – 1.15</b> | <b>7.06 x 10<sup>-04</sup></b> | <b>1.66 x 10<sup>-02</sup></b> |
| <b>plasma</b>          | <b>S4</b>            | <b>1.10</b>       | <b>1.04 – 1.16</b> | <b>8.06 x 10<sup>-04</sup></b> | <b>1.66 x 10<sup>-02</sup></b> |
| <b>plasma</b>          | <b>G4</b>            | <b>1.09</b>       | <b>1.03 – 1.15</b> | <b>1.18 x 10<sup>-03</sup></b> | <b>1.87 x 10<sup>-02</sup></b> |
| <b>plasma</b>          | <b>HB</b>            | <b>1.08</b>       | <b>1.03 – 1.13</b> | <b>2.16 x 10<sup>-03</sup></b> | <b>2.19 x 10<sup>-02</sup></b> |
| <b>plasma</b>          | <b>G3</b>            | <b>1.07</b>       | <b>1.02 – 1.13</b> | <b>5.28 x 10<sup>-03</sup></b> | <b>4.28 x 10<sup>-02</sup></b> |
| plasma                 | G1                   | 0.91              | 0.85 – 0.98        | 1.06 x 10 <sup>-02</sup>       | 7.17 x 10 <sup>-02</sup>       |
| plasma                 | S1                   | 0.97              | 0.95 – 1.00        | 4.10 x 10 <sup>-02</sup>       | 1.58 x 10 <sup>-01</sup>       |
| plasma                 | S2                   | 1.03              | 1.00 – 1.07        | 6.37 x 10 <sup>-02</sup>       | 1.95 x 10 <sup>-01</sup>       |
| plasma                 | CF                   | 0.94              | 0.88 – 1.00        | 6.60 x 10 <sup>-02</sup>       | 1.98 x 10 <sup>-01</sup>       |
| plasma                 | G0                   | 0.95              | 0.87 – 1.02        | 1.83 x 10 <sup>-01</sup>       | 4.00 x 10 <sup>-01</sup>       |
| plasma                 | HM                   | 1.01              | 0.98 – 1.05        | 3.52 x 10 <sup>-01</sup>       | 5.66 x 10 <sup>-01</sup>       |
| plasma                 | G2                   | 0.99              | 0.95 – 1.02        | 4.36 x 10 <sup>-01</sup>       | 6.31 x 10 <sup>-01</sup>       |
| plasma                 | B                    | 1.01              | 0.95 – 1.07        | 7.38 x 10 <sup>-01</sup>       | 8.54 x 10 <sup>-01</sup>       |

### A plasma N-glycome

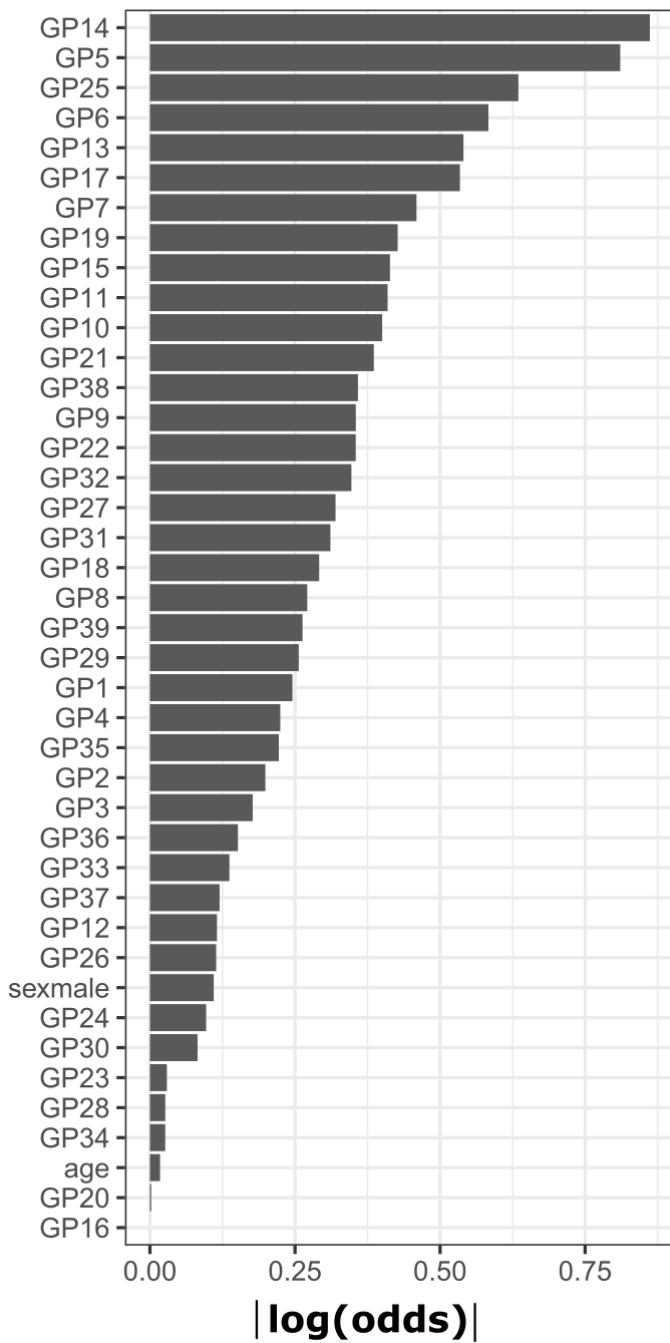

### B IgG N-glycome

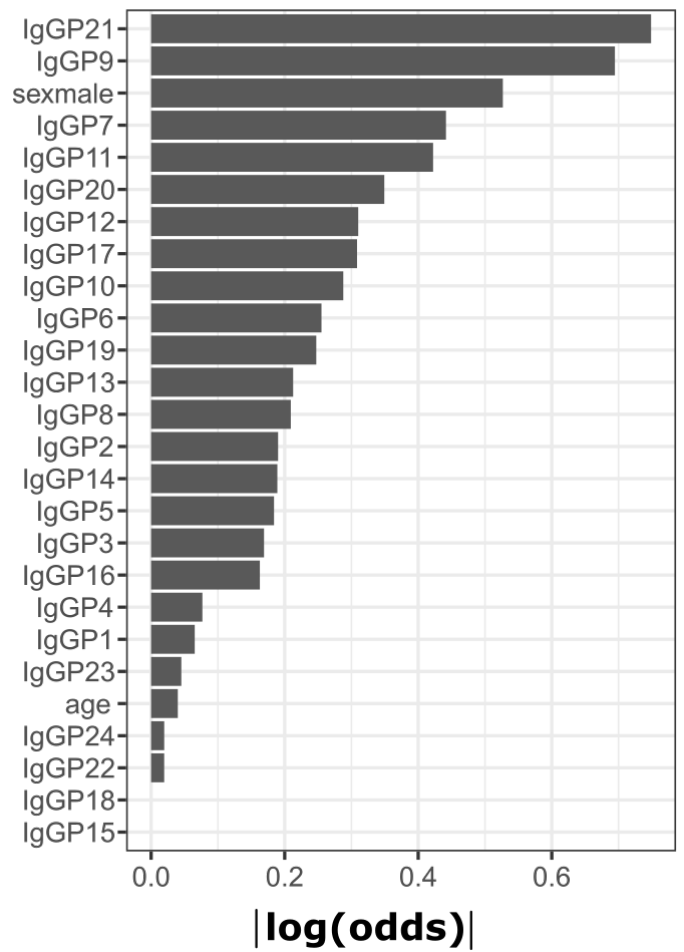

**Figure S3** Contribution of individual glycans in multiple sclerosis classification model. Individual glycan performance is expressed as an absolute change in log(odds) for increase of 1 SD in glycan abundance. IgGP – IgG glycan peak; GP – plasma glycan peak
